# Supplementary material for: Identification of Long Noncoding RNAs That Exert Transcriptional Regulation by Forming RNA–DNA Triplexes in Prostate Cancer
Source: MDPI journal article supplement (doi:10.3390/ijms24032035), 2023-01-19
Supplement: s1 [file s1]

**Table S6. Primers used in DNA fragment generation.**

| Name            | Sequence (5' to 3')                                 |
|-----------------|-----------------------------------------------------|
| AD000684.2-T7-F | taatacgactcactatagggTAATACGACTCACTATAGGG<br>AATGCTG |
| AD000684.2-T7-R | GCAAGTCTTTTTCAATTGCACATG                            |
