# Supplementary material for: Identification of Long Noncoding RNAs That Exert Transcriptional Regulation by Forming RNA–DNA Triplexes in Prostate Cancer
Source: MDPI journal article supplement (doi:10.3390/ijms24032035), 2023-01-19
Supplement: s1 [file s1]

**Table S9. Primers used in qPCR.**

| Name             | Sequence (5' to 3')   |
|------------------|-----------------------|
| $\beta$ -actin-F | CCTCTCCCAAGTCCACACAG  |
| $\beta$ -actin-R | GGGCACGAAGGCTCATCATT  |
| AD000684.2-F     | TCCCAACGGGACACTTTCAC  |
| AD000684.2-R     | CTACCCAGACACCCTCCTGA  |
| ASMTL-AS1-F      | ACGAGATACGTCCGTCAGGT  |
| ASMTL-AS1-R      | GGAGCTCTGTTCAAGTCCCC  |
| SLC23A3-F        | ACCAGAACGCCTACTTCTGC  |
| SLC23A3-R        | GCAACCCACCCTATTGGGAA  |
| CPT1B-F          | TGGGCTTACCTAGAGTCTGTG |
| CPT1B-R          | TCCCACCAGTCACTCACATAG |
| MSH5-F           | GAAGATAAGCGCGTGAGGCT  |
| MSH5-R           | ATGAGCTTGAGGCTCCTTTG  |
| KAT2A-F          | CCCGCTACGAAACCACTCAT  |
| KAT2A-R          | GCATGGACAGGAATTTGGGGA |
| LYG1-F           | TGGTCAACATGGGCGATAGG  |
| LYG1-R           | TCTCAGGTACTGGTCAGGGG  |
| PRR22-F          | GCACCCCAAACCGTTCTGT   |
| PRR22-R          | ATACAGGTTCAAGGAGCCCAT |
| RGL2-F           | GCAGTCCTTTCTGAGTTGCG  |
| RGL2-R           | CACAGGATACACGATGGCTCT |
