# Supplementary material for: Identification of Long Noncoding RNAs That Exert Transcriptional Regulation by Forming RNA–DNA Triplexes in Prostate Cancer
Source: MDPI journal article supplement (doi:10.3390/ijms24032035), 2023-01-19
Supplement: s1 [file s1]

**Table S8. siRNA sequences used in knockdown experiments.**

| Name            | Sequence (5' to 3')   |
|-----------------|-----------------------|
| si-NC           | UUCUCCGAACGUGUCACGUTT |
| si-AD000684.2-1 | GAGGGACCUAACUCUAUGATT |
| si-AD000684.2-2 | GCCAAAUUUAAGCAAUGUTT  |
| si-ASMTL-AS1-1  | GGGUCUUCCUGAAGUACAUTT |
| si-ASMTL-AS1-2  | CUGGGUAAGAAGAGCUAAATT |
