# Supplementary material for: Identification of Long Noncoding RNAs That Exert Transcriptional Regulation by Forming RNA–DNA Triplexes in Prostate Cancer
Source: MDPI journal article supplement (doi:10.3390/ijms24032035), 2023-01-19
Supplement: s1 [file s1]

**Table S7. Nucleotide sequences used in triplex assays.**

| Name               | Sequence (5' to 3')                                            |
|--------------------|----------------------------------------------------------------|
| AD000684.2-TFO     | AAGCAGGGGAAGGTAAGAGAAGACAGAAGACA<br>GAGAGAGAGG                 |
| AD000684.2-TFO-mut | AAGCAGCGGTTGGTAACAGATCACAGAAGACAG<br>TCAGACTGG                 |
| SLC23A3-FAM        | GCAGAATGTTTTCTCTCCATCCTCTCCTCTCTTC<br>TACCAGGTGTCCGGGG-TEG-FAM |
| CPT1B-FAM          | GGGTTCTGAGCTAGACGGGAGAGGCAGACAGG<br>GCACTGGTGCCTGGTGTG-TEG-FAM |
| MSH5-FAM           | CTCCTATCTCAGTAGCTCCTCTTTCCCTCTCTGG<br>GCTTCTCTTTCCACTC-TEG-FAM |
| KAT2A-FAM          | TTCTATAGAGAGCACCCGAGAGAGAGAGGAGAA<br>GGAGAACCTTGTCCCTG-TEG-FAM |
| LYG1-FAM           | TTCCCCTTCTCACTCTCTCTCTCCTTCTCACTCT<br>CTCTCTCTTTCTCTCT-TEG-FAM |
